# Supplementary material for: Current control by electrode coatings formed by polymerization of dopamine at prussian blue-modified electrodes
Source: Royal Society of Chemistry journal article supplement (doi:10.1039/c6an00132g), 2016-01-01
Supplement: c6an00132g1.pdf [file c6an00132g1.pdf]

## **Supporting Information**

### **Current Control by Electrode Coatings Formed by Polymerization of Dopamine at Prussian blue-modified Electrodes**

Bowen Gao, Lei Su,\* Hankun Yang, Tong Shu, and Xueji Zhang\*

Research Center for Bioengineering and Sensing Technology, School of Chemistry and Biological Engineering, University of Science and Technology Beijing, Beijing 100083, China.

\* Corresponding author. E-mail: [sulei@ustb.edu.cn](mailto:sulei@ustb.edu.cn); [zhangxueji@ustb.edu.cn](mailto:zhangxueji@ustb.edu.cn).

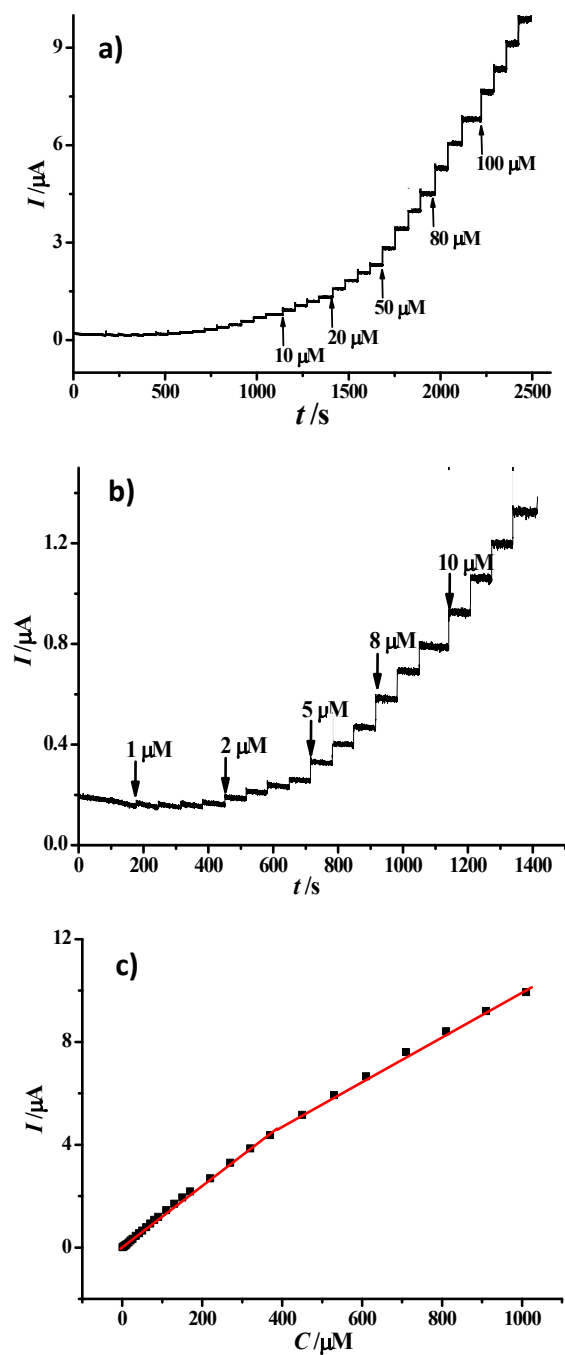

**Fig. S1** a) Current-time responses of the PDA-coated PB electrode to the successive addition of  $\text{H}_2\text{O}_2$  in 0.1 M phosphate buffer solution (pH 7.4). Applied potential: +0.7 V vs Ag/AgCl. b) A close look of the response current to  $\text{H}_2\text{O}_2$  from 1  $\mu\text{M}$  to 40  $\mu\text{M}$ . c) Calibration curve of the amperometric responses to the  $\text{H}_2\text{O}_2$  concentration from 1  $\mu\text{M}$  to 1050  $\mu\text{M}$ .

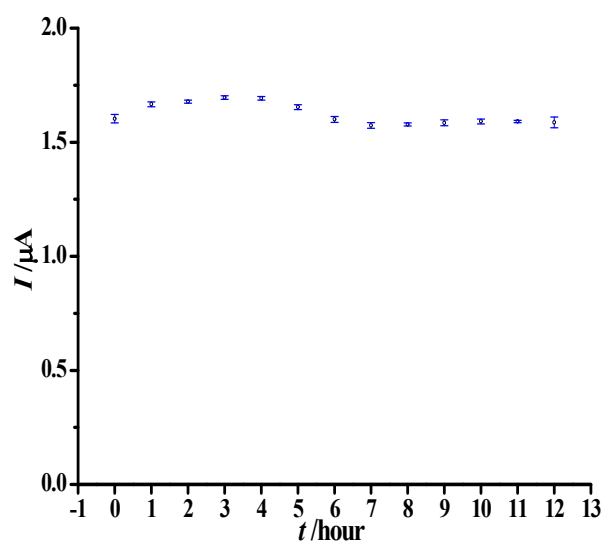

**Fig. S2** Current-time responses of the FIA system equipped with the PDA-coated PB electrode to injection of 1 mM  $\text{H}_2\text{O}_2$ ; 0.1 M phosphate buffer solution (pH 7.4); flow rate  $100\ \mu\text{L min}^{-1}$ , operating potential: +0.7 V vs Ag/AgCl.

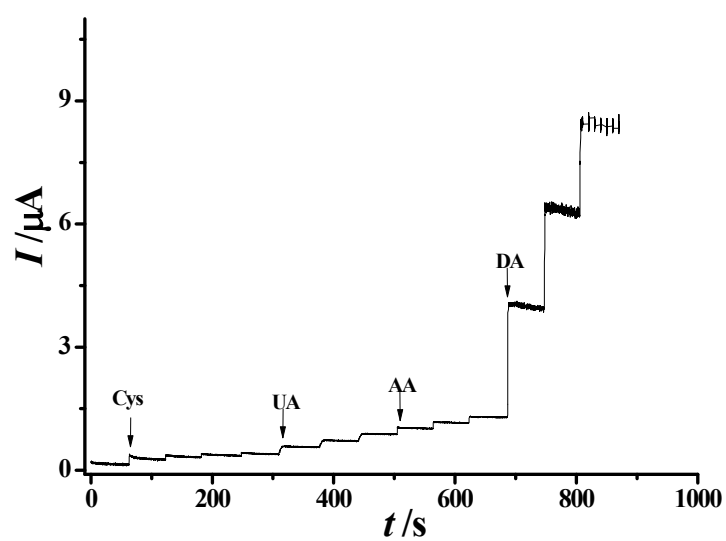

**Fig. S3** Current-time responses of the PDA-coated PB electrode to successive addition of 25  $\mu\text{M}$  Cys, UA, AA and DA. Applied potential: 0.7 V vs Ag/AgCl. The solution was stirred with a magnetic stirrer. The arrows indicated the addition of the solutions of each kind of the potential interferents.

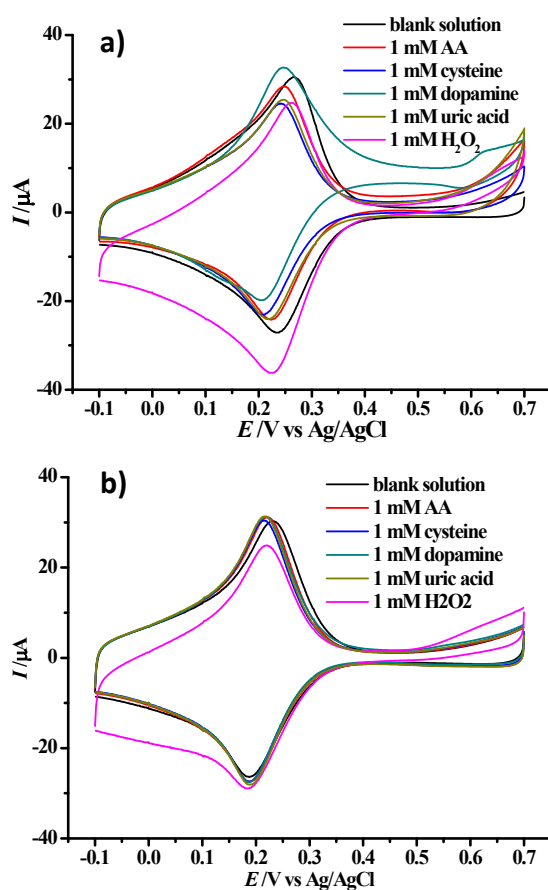

**Fig. S4** Cyclic voltammetric responses of the PB electrode (a) and the PDA-coated PB electrode (b) to 1 mM  $H_2O_2$  and the potential interferents (AA, UA, DA, Cys, 1 mM) at a scan rate of 50  $mV\ s^{-1}$ .
